# Supplementary material for: Replacing the SpCas9 HNH domain by deaminases generates compact base editors with an alternative targeting scope
Source: PubMed Central journal article supplement — Mol Ther Nucleic Acids. 2021 Aug 26;26:502–10. doi: 10.1016/j.omtn.2021.08.025 (PMC8479293; doi:10.1016/j.omtn.2021.08.025), 2021-08-26
Supplement: mmc1.pdf [file mmc1.pdf]

OMTN, Volume 26

## **Supplemental information**

**Replacing the *SpCas9* HNH domain  
by deaminases generates compact base  
editors with an alternative targeting scope**

**Lukas Villiger, Lukas Schmidheini, Nicolas Mathis, Tanja Rothgangl, Kim Marquart, and Gerald Schwank**



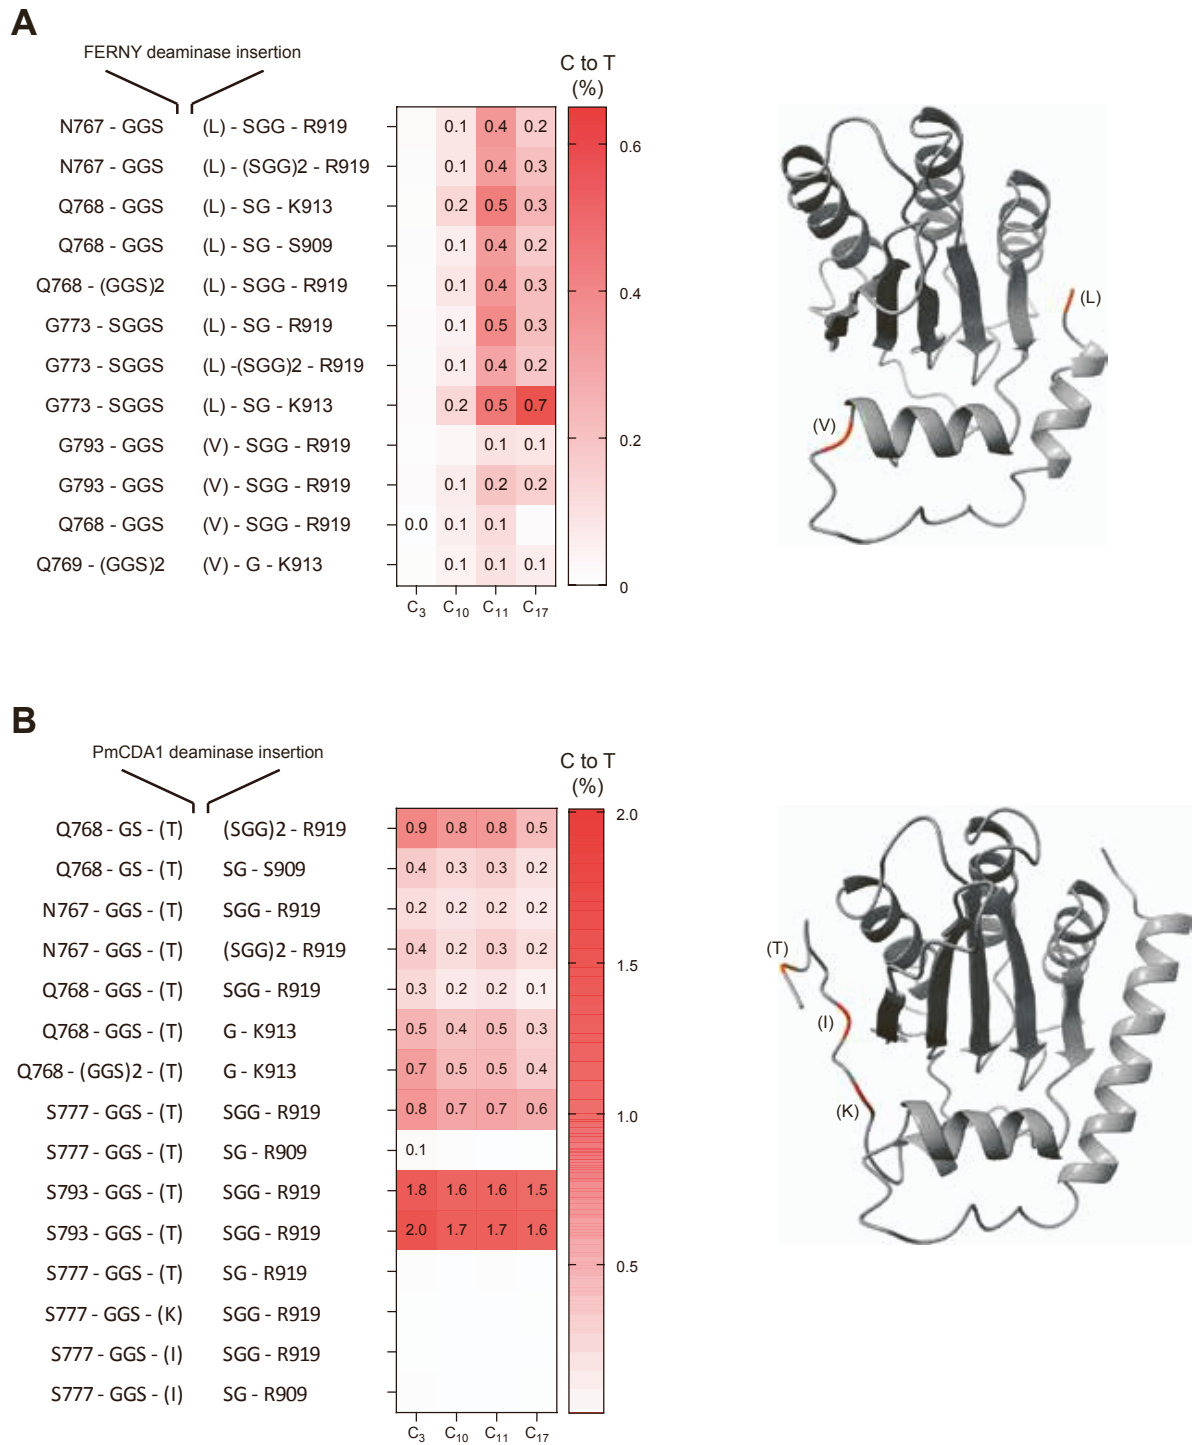

**Figure S2. Linker optimization for FERNY and PmCDA1 integration (A, B)** Heat map depicting different flanking amino acids of Cas9 and linkers to incorporate the FERNY (A) and PmCDA1 (B) deaminases in place of the HNH domain. The FERNY and PmCDA1 deaminase reading frames are listed in the Supplementary Information. Linkers that join Cas9 and deaminase at different amino acid positions within the deaminase are indicated in brackets.

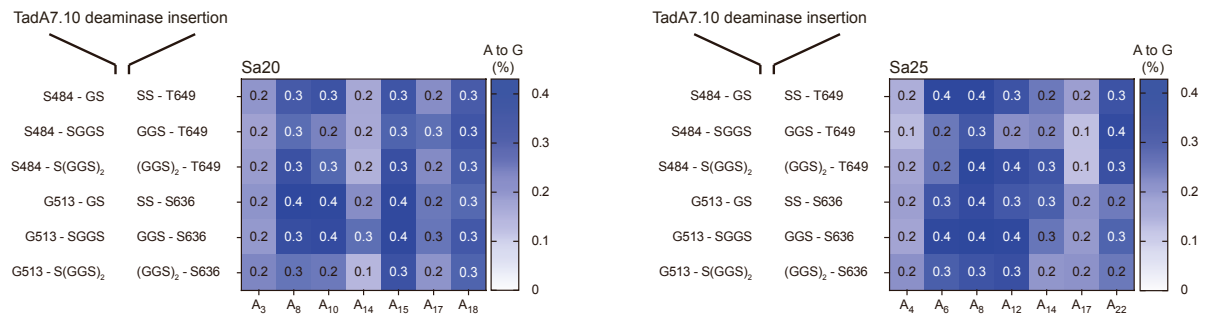

**Figure S3. *Sa*KKH-HNHx-ABEmax7.10 constructs** Heat map depicting editing efficiencies with *Sa*KKH-HNHx-ABEmax7.10 constructs, where different linkers were used to incorporate the TadA deaminase in place of the HNH domain of *Sa*Cas9-KKH. Editing efficiencies of different adenine bases within the protospacer region on endogenous loci Sa20 (left) and Sa25 (right) in HEK293T cells. Numbering starts with PAM-distal nucleotides. Values represent mean of two independent biological replicates performed on separate days  $\pm$  s.d. The TadA deaminase reading frame is listed in the Supplementary Information.



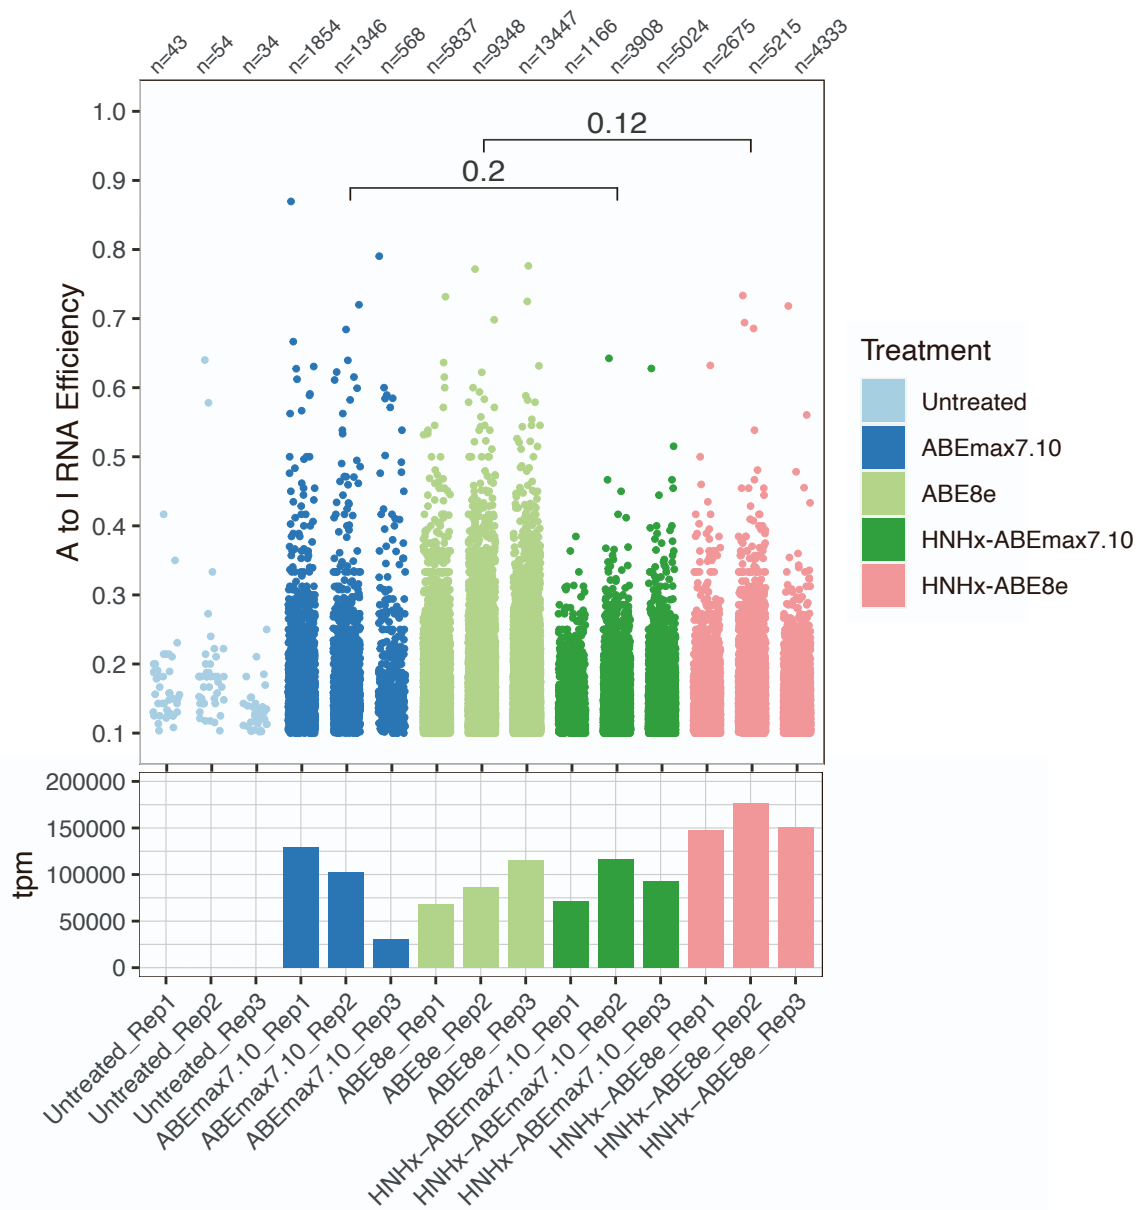

**Figure S4. Transcriptome-wide RNA off-target deamination** RNA-seq analysis of transcriptome-wide A to I RNA off-target editing after transfection of ABEmax7.10, ABE8e, HNHx-ABEmax7.10 and HNHx-ABE8e constructs. Indicated p-Values represent comparison of means of three independent biological replicates using two-tailed unpaired t-test.

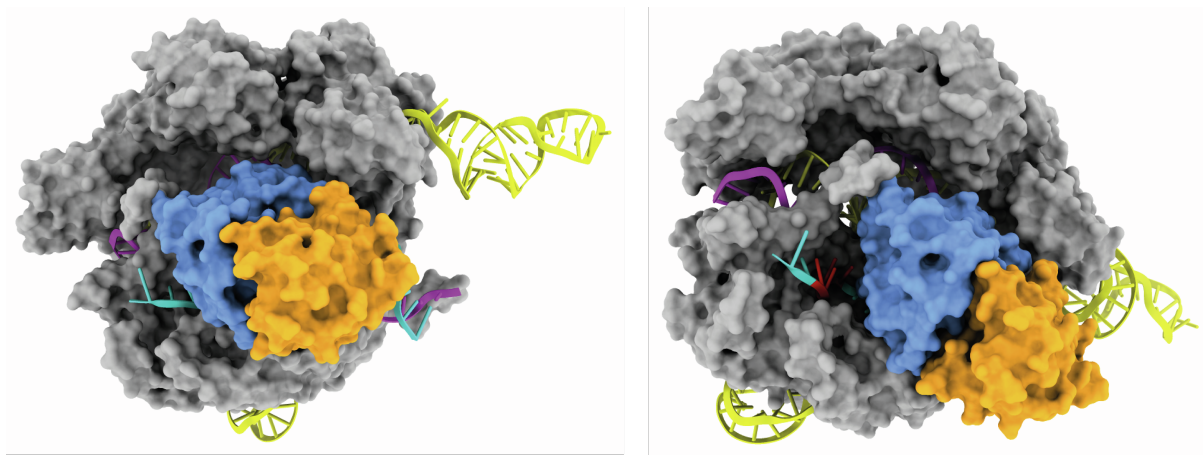

**Figure S5. Different viewing angles of a hypothetical HNHx-ABE variant with a dimerized TadA** Subunits are colored as follows: Cas9  $\Delta$ HNH, grey; TadA linked to Cas9, blue; TadA from another molecule dimerizes to Cas9-bound TadA for functional deamination, orange.

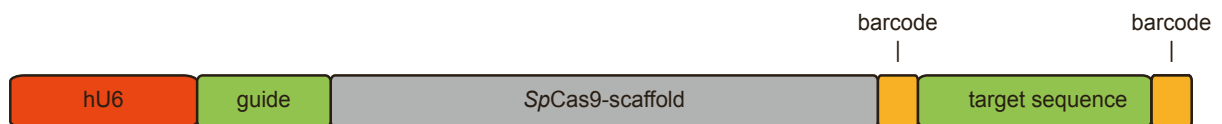

**Figure S6. Schematic organisation of a self-targeting construct** Each self-targeting construct consists of a human U6 promoter (red), a constant *SpCas9* scaffold (grey), a matching guide- and target sequence (green) and unique barcodes (orange). Sequences used are listed in Supplementary Table 2.

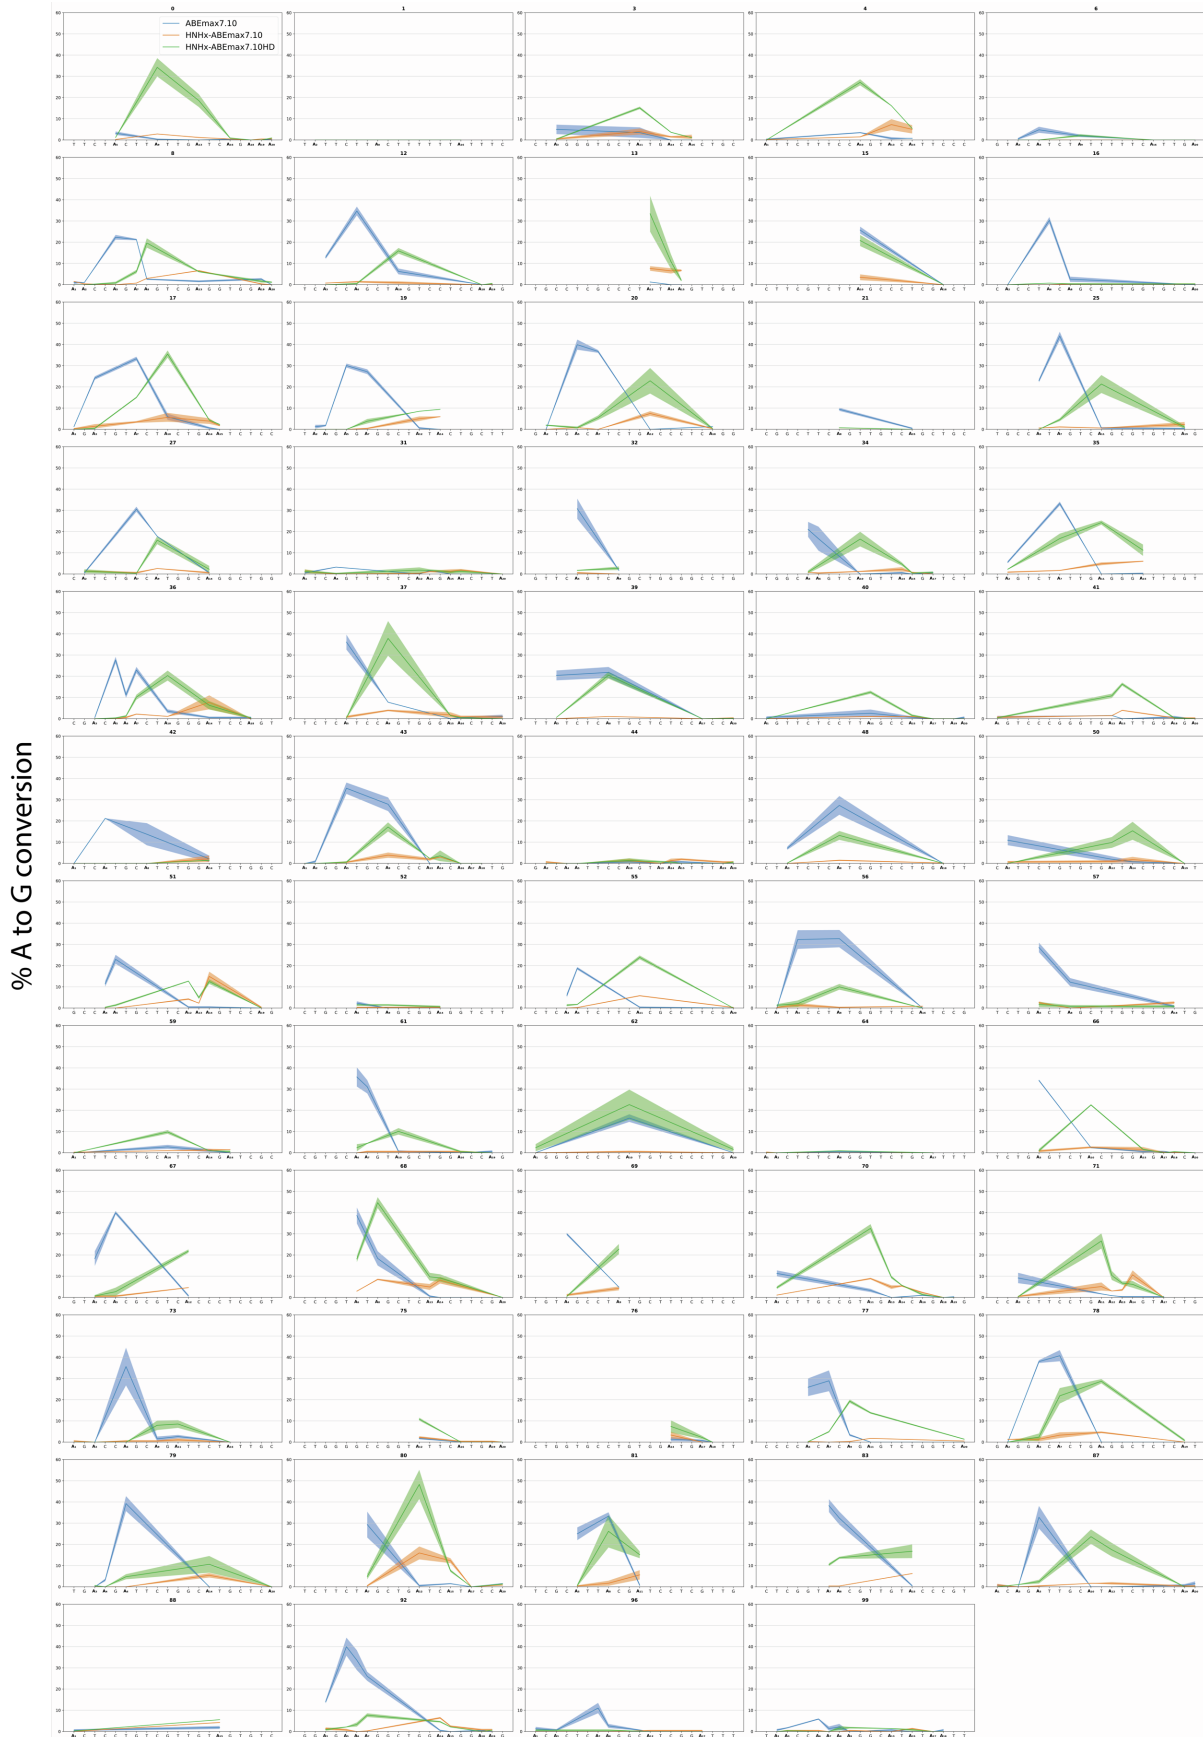

**Figure S7. A to G conversions using Tada7.10-based constructs on self-targeting loci** High throughput sequencing data compares editing efficiencies of ABEmax7.10, HNHx-

ABEmax7.10 and HNHx-ABEmax7.10HD on 59 self-targeting loci in HEK293T cells. Solid line represents mean of two independent biological replicates performed on separate days, with error band indicating  $\pm$  s.d.

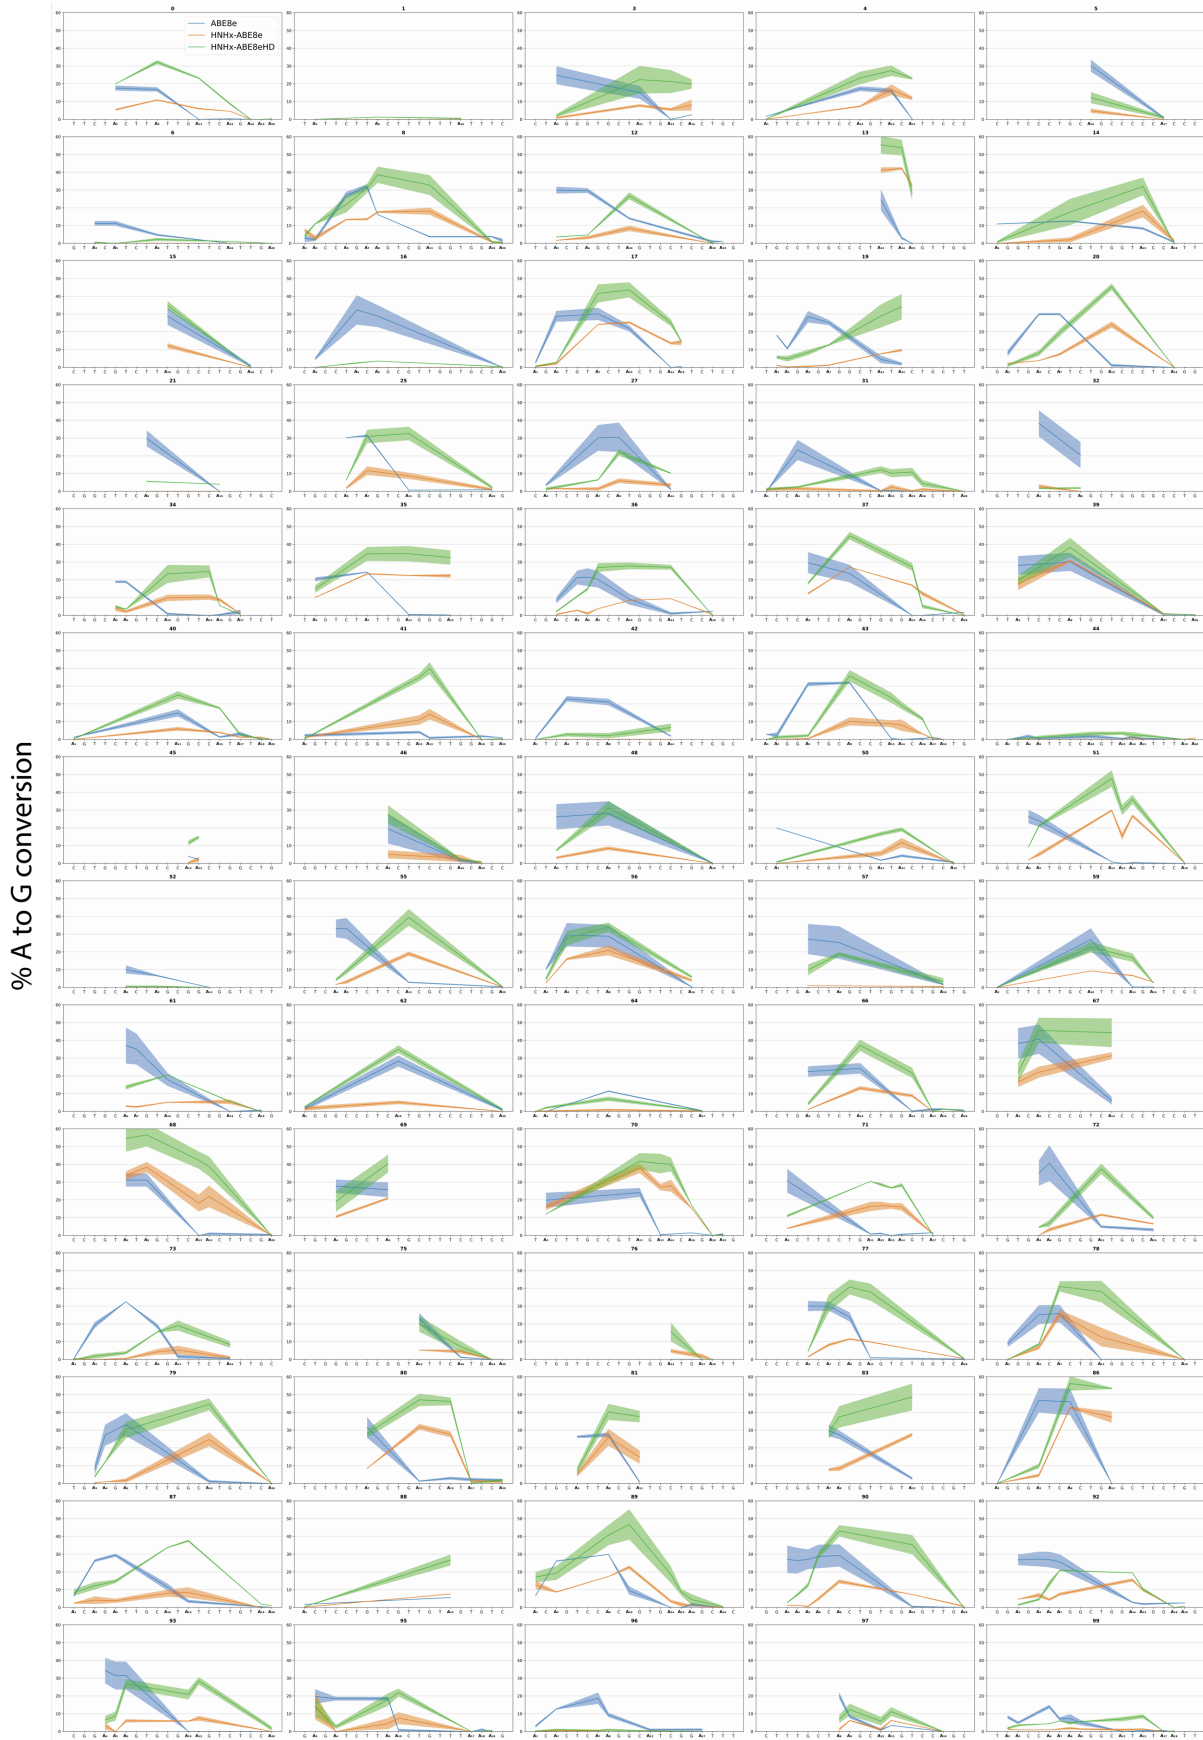

**Figure S8. A to G conversions using TadA8e-based constructs on self-targeting loci. High throughput sequencing data compares editing efficiencies of ABE8e, HNHx-ABE8e and**

HNHx-ABE8eHD on 70 self-targeting loci in HEK293T cells. Solid line represents mean of two independent biological replicates performed on separate days, with error band indicating  $\pm$  s.d.

## PRIMER and gBLOCK SEQUENCES

See Supplemental tables 1 & 2.

## AMINO ACID SEQUENCES OF BASE EDITOR CONSTRUCTS

### HNHx-ABEmax7.10

MKRTADGSEFEFPKKKRKVGSDDKYSIGLAIGTNSVGWAVITDEYKVPSSKKFKVLGNTDRHSIKKNLI  
GALLFDSGETAEATRLKRTARRRYTRRKNRICYLQEIFSNEMAKVDDSSFHRLSEESFLVEEDKKHERH  
PIFGNIVDEVAYHEKYPTIYHLRKKLVSDTKADLRLIYLALAHMIKFRGHFLIEGDLNPDNSDVKL  
FIQLVQTYNQLFEEENPINASGVDAKAILSARLSKSRLENLIAQLPGEKKNGLFGNLIALSGLTPNF  
KSNFDLAEDAQLQLSKDQYDDDLNLLAQIGDQYADLFLAAKNLSDAILLSDILRVNTEITKAPLSAS  
MIKRYDEHHQDLTLLKALVRQQLPEKYKEIFFDQSKNGYAGYIDGGASQEEFYKFIKPILEKMDGTEE  
LLVKLNREDLLRKQRTFDNGSIPHQIHLGELHAILRRQEDFYFPLKDNREKIEKILTFRIPYYVGPLA  
RGNRSFAWMTRKSEETITPWNFEVVDKGSASQSFIERMTNFDKNLPNEKVLPKHSLLYEYFTVYNEL  
TKVKYVTEGMRKPAFLSGEQKKAIVDLLFKTNRKVTVKQLKEDYFKKIECFDSVEISGVEDRFNASLG  
TYHDLLKIIKDKDFLDNEENEDILEDIVLTLTLFEDREMIEERLKYAHLFDDKVMKQLKRRRYTGWG  
RLSRKLINGIRDKQSGKTILDFLKSDGFANRFMQLIHDDSLTFKEDIQKAQVSGQGDLSHEHIANLA  
GSPAIIKKGILQTVKVVDELVKVMGRHKPENIVIAMARENQTTQKGQKNSRERMKRIEEGIKELSGGS  
SEVEFSHEYWMRHALTLAKRARDEREVPGAVLVLNRRVIGEGWNRAIGLHDPTAHAEIMALRQGGLV  
MQNYRLIDATLYVTFEPCVMCAGAMIHSRIGRVVFGVRNAKTGAAGSLMDVLHYPGMNRVEITEGIL  
ADECAALLCYFFRMPRQVFNAQKKAQSSTDSGGRQLVETRQITKHVAQILD SRMNTKYDENDKLIREV  
KVI TLKSKLVSDFRKDFQFYK VREINNYHHAHDAYLNAVVG TALIKKYPKLESEFVYGDYKVYDVRKM  
IAKSEQEIGKATAKYFFYSNIMNFFKTEITLANGEIRKRPLIETNGETGEIVWDKGRDFATVRKVL SM  
PQVNIVKKTEVQTGGFSKESILPKRNSDKLIARKKDWDPKKYGGFDSPTVAYSVLVVAKVEKGKSKKL  
KSVKELLGITIMERSSEFKNPIDFLEAKGYKEVKKDLIIKLPKYSLFELENGRKRMLASAGELQKGNE  
LALPSKYVNFLYLASHYEKLGKSPEDNEQKQLFVEQHKHYLDEIIIEQISEFSKRVI LADANLDKVL SA  
YNKHRDKPIREQAENI IHLFTLTNLGAPAAFKYFDTTIDRKRYTSTKEVLDATLIHQSI TGLYETRID  
LSQLGGDSGGSKRTADGSEFEFPKKKRKV

Nuclear localization signal, SpCas9, Linker (Cas9), Linker (Gly-Gly-Ser, Ser-Gly-Gly), TadA (adenosine deaminase, 7.10)

## HNHx-ABE8e

MKRTADGSEFE<sup>S</sup>PKKKR<sup>KV</sup>GS<sup>D</sup>DKKYSIGLAIGTNSVGVAVITDEYKVPSKKFKVLGNTDRHSIKKNLI  
GALLFDSGETAEATRLKRTARRRYTRRKNRICYLQEIFSNEMAKVDDSFHRLEESFLVEEDKKHERH  
PIFGNIVDEVAYHEKYPTIYHLRKKLVSTDKADLRLIYLALAHMIKFRGHFLIEGDLNPDNSDVVKL  
FIQLVQTYNQLFEEENPINASGVDAKAILSARLSKSRLENLIAQLPGEKKNGLFGNLIASLGLTPNF  
KSNFDLAEDAQLQ<sup>L</sup>SKD<sup>T</sup>YDDDLNLLAQIGDQYADLFLAAKNLSDAILLSDILRVNTEITKAPLSAS  
MIKRYDEHHQDLTLLKALVRQQLPEKYKEIFFDQSKNGYAGYIDGGASQEEFYKFIKPILEKMDGTEE  
LLVKLNREDLLRKQRTFDNGSIPHQIHLGELHAILRRQEDFY<sup>P</sup>FLKDNREKIEKILTFRI<sup>P</sup>YYVG<sup>P</sup>LA  
RGNSRFAMWTRKSEETITPWNFEEVVDK<sup>G</sup>ASQ<sup>S</sup>FIERMTNFDKNLPNEKVL<sup>P</sup>KHSL<sup>L</sup>YEYFT<sup>V</sup>YNEL  
TKVKYVTEGMRKPAFLS<sup>G</sup>EQK<sup>A</sup>IVD<sup>L</sup>L<sup>L</sup>FK<sup>T</sup>NR<sup>K</sup>VT<sup>V</sup>K<sup>Q</sup>LKEDY<sup>F</sup>KKIE<sup>C</sup>FDS<sup>V</sup>EIS<sup>G</sup>VED<sup>R</sup>FNAS<sup>L</sup>G  
TYHDLLKIIKDKDFLDNEENEDILEDIVLTLTLFEDREMIEERLKYAHLFDDKVMKQLKRRRYTGWG  
RLSRKLINGIRDKQSGKTILD<sup>F</sup>LKSD<sup>G</sup>FAN<sup>R</sup>N<sup>F</sup>M<sup>Q</sup>L<sup>I</sup>HDDSLTFKEDIQKAQVSGQGD<sup>S</sup>LHEHIAN<sup>L</sup>A  
GSPA<sup>I</sup>KK<sup>G</sup>IL<sup>Q</sup>TV<sup>K</sup>V<sup>V</sup>DEL<sup>V</sup>K<sup>V</sup>M<sup>G</sup>R<sup>H</sup>K<sup>P</sup>EN<sup>I</sup>VIEMAREN<sup>Q</sup>TT<sup>Q</sup>K<sup>G</sup>Q<sup>K</sup>NS<sup>R</sup>ERM<sup>K</sup>RIE<sup>E</sup>G<sup>I</sup>KEL<sup>G</sup>SG<sup>G</sup>S  
<sup>S</sup>E<sup>V</sup>E<sup>F</sup>S<sup>H</sup>E<sup>Y</sup>W<sup>M</sup>R<sup>H</sup>A<sup>L</sup>T<sup>L</sup>A<sup>K</sup>R<sup>A</sup>R<sup>D</sup>E<sup>R</sup>E<sup>V</sup>P<sup>V</sup>G<sup>A</sup>V<sup>L</sup>V<sup>L</sup>N<sup>N</sup>R<sup>V</sup>I<sup>G</sup>E<sup>G</sup>W<sup>N</sup>R<sup>A</sup>I<sup>G</sup>L<sup>H</sup>D<sup>P</sup>T<sup>A</sup>H<sup>A</sup>E<sup>I</sup>M<sup>A</sup>L<sup>R</sup>Q<sup>G</sup>G<sup>L</sup>V  
<sup>M</sup>Q<sup>N</sup>Y<sup>R</sup>L<sup>I</sup>D<sup>A</sup>T<sup>L</sup>Y<sup>V</sup>T<sup>F</sup>E<sup>P</sup>C<sup>V</sup>M<sup>C</sup>A<sup>G</sup>A<sup>M</sup>I<sup>H</sup>S<sup>R</sup>I<sup>G</sup>R<sup>V</sup>V<sup>F</sup>G<sup>V</sup>R<sup>N</sup>S<sup>K</sup>R<sup>G</sup>A<sup>A</sup>G<sup>S</sup>L<sup>M</sup>N<sup>V</sup>L<sup>N</sup>Y<sup>P</sup>G<sup>M</sup>N<sup>H</sup>R<sup>V</sup>E<sup>I</sup>T<sup>E</sup>G<sup>I</sup>L  
<sup>A</sup>D<sup>E</sup>C<sup>A</sup>A<sup>L</sup>L<sup>C</sup>D<sup>F</sup>Y<sup>R</sup>M<sup>P</sup>R<sup>Q</sup>V<sup>F</sup>N<sup>A</sup>Q<sup>K</sup>K<sup>A</sup>Q<sup>S</sup>S<sup>T</sup>N<sup>S</sup>G<sup>G</sup>R<sup>Q</sup>L<sup>V</sup>E<sup>T</sup>R<sup>Q</sup>I<sup>T</sup>K<sup>H</sup>V<sup>A</sup>Q<sup>I</sup>L<sup>D</sup>S<sup>R</sup>M<sup>N</sup>T<sup>K</sup>Y<sup>D</sup>E<sup>N</sup>D<sup>K</sup>L<sup>I</sup>R<sup>E</sup>V  
<sup>K</sup>V<sup>I</sup>T<sup>L</sup>K<sup>S</sup>K<sup>L</sup>V<sup>S</sup>D<sup>F</sup>R<sup>K</sup>D<sup>F</sup>Q<sup>F</sup>Y<sup>K</sup>V<sup>R</sup>E<sup>I</sup>N<sup>N</sup>Y<sup>H</sup>H<sup>A</sup>H<sup>D</sup>A<sup>Y</sup>L<sup>N</sup>A<sup>V</sup>V<sup>G</sup>T<sup>A</sup>L<sup>I</sup>K<sup>K</sup>Y<sup>P</sup>K<sup>L</sup>E<sup>S</sup>E<sup>F</sup>V<sup>Y</sup>G<sup>D</sup>Y<sup>K</sup>V<sup>Y</sup>D<sup>V</sup>R<sup>K</sup>M  
<sup>I</sup>A<sup>K</sup>S<sup>E</sup>Q<sup>E</sup>I<sup>G</sup>K<sup>A</sup>T<sup>A</sup>K<sup>Y</sup>F<sup>F</sup>Y<sup>S</sup>N<sup>I</sup>M<sup>N</sup>F<sup>F</sup>K<sup>T</sup>E<sup>I</sup>T<sup>L</sup>A<sup>N</sup>G<sup>E</sup>I<sup>R</sup>K<sup>R</sup>P<sup>L</sup>I<sup>E</sup>T<sup>N</sup>G<sup>E</sup>T<sup>G</sup>E<sup>I</sup>V<sup>W</sup>D<sup>K</sup>G<sup>R</sup>D<sup>F</sup>A<sup>T</sup>V<sup>R</sup>K<sup>V</sup>L<sup>S</sup>M  
<sup>P</sup>Q<sup>V</sup>N<sup>I</sup>V<sup>K</sup>K<sup>T</sup>E<sup>V</sup>Q<sup>T</sup>G<sup>G</sup>F<sup>S</sup>K<sup>E</sup>S<sup>I</sup>L<sup>P</sup>K<sup>R</sup>N<sup>S</sup>D<sup>K</sup>L<sup>I</sup>A<sup>R</sup>K<sup>K</sup>D<sup>W</sup>D<sup>P</sup>K<sup>K</sup>Y<sup>G</sup>G<sup>F</sup>D<sup>S</sup>P<sup>T</sup>V<sup>A</sup>Y<sup>S</sup>V<sup>L</sup>V<sup>V</sup>A<sup>K</sup>V<sup>E</sup>K<sup>G</sup>K<sup>S</sup>K<sup>L</sup>  
<sup>K</sup>S<sup>V</sup>K<sup>E</sup>L<sup>L</sup>G<sup>I</sup>T<sup>I</sup>M<sup>E</sup>R<sup>S</sup>S<sup>F</sup>E<sup>K</sup>N<sup>P</sup>I<sup>D</sup>F<sup>L</sup>E<sup>A</sup>K<sup>Y</sup>K<sup>E</sup>V<sup>K</sup>D<sup>L</sup>I<sup>I</sup>K<sup>L</sup>P<sup>K</sup>Y<sup>S</sup>L<sup>F</sup>E<sup>L</sup>E<sup>N</sup>G<sup>R</sup>K<sup>R</sup>M<sup>L</sup>A<sup>S</sup>A<sup>G</sup>E<sup>L</sup>Q<sup>K</sup>G<sup>N</sup>E  
<sup>L</sup>A<sup>L</sup>P<sup>S</sup>K<sup>Y</sup>V<sup>N</sup>F<sup>L</sup>Y<sup>L</sup>A<sup>S</sup>H<sup>E</sup>K<sup>L</sup>K<sup>G</sup>S<sup>P</sup>E<sup>D</sup>N<sup>E</sup>Q<sup>Q</sup>L<sup>F</sup>V<sup>E</sup>Q<sup>H</sup>K<sup>H</sup>Y<sup>L</sup>D<sup>E</sup>I<sup>I</sup>E<sup>Q</sup>I<sup>S</sup>E<sup>F</sup>S<sup>K</sup>R<sup>V</sup>I<sup>L</sup>A<sup>D</sup>A<sup>N</sup>L<sup>D</sup>K<sup>V</sup>L<sup>S</sup>A  
<sup>Y</sup>N<sup>K</sup>H<sup>R</sup>D<sup>K</sup>P<sup>I</sup>R<sup>E</sup>Q<sup>A</sup>E<sup>N</sup>I<sup>I</sup>H<sup>L</sup>F<sup>T</sup>L<sup>T</sup>N<sup>L</sup>G<sup>A</sup>P<sup>A</sup>A<sup>F</sup>K<sup>Y</sup>F<sup>D</sup>T<sup>T</sup>I<sup>D</sup>R<sup>K</sup>R<sup>Y</sup>T<sup>S</sup>T<sup>K</sup>E<sup>V</sup>L<sup>D</sup>A<sup>T</sup>L<sup>I</sup>H<sup>Q</sup>S<sup>I</sup>T<sup>G</sup>L<sup>Y</sup>E<sup>T</sup>R<sup>I</sup>D  
<sup>L</sup>S<sup>Q</sup>L<sup>G</sup>G<sup>D</sup>S<sup>G</sup>G<sup>S</sup>K<sup>R</sup>T<sup>A</sup>D<sup>G</sup>S<sup>E</sup>F<sup>E</sup>P<sup>K</sup>K<sup>R</sup>K<sup>V</sup>

Nuclear localization signal, SpCas9, Linker (Cas9), Linker (Gly-Gly-Ser, Ser-Gly-Gly), TadA (adenosine deaminase, 8e)



## HNHx-ABEmax7.10HD

MKRTADGSEFE<sup>S</sup>PKKKR<sup>KV</sup>GS<sup>D</sup>DKKYSIGLAIGTNSVGVAVITDEYKVPSKFKVLGNTDRHSIKKNLI  
GALLFDSGETAEATRLKRTARRRYTRRKNRICYLQEIFSNEMAKVDDSFHRLEESFLVEEDKKHERH  
PIFGNIVDEVAYHEKYPTIYHLRKKLVSTDKADLRLIYLALAHMIKFRGHFLIEGDLNPDNSDVDKL  
FIQLVQTYNQLFEENPINASGVDAKAILSARLSKSRLENLIAQLPGEKKNGLFGNLIALSGLTPNF  
KSNFDLAEDAQLQSKDQYDDDLNLLAQIGDQYADLFLAAKNLSDAILLSDILRVNTEITKAPLSAS  
MIKRYDEHHQDLTLLKALVRQQLPEKYKEIFFDQSKNGYAGYIDGGASQEEFYKFIKPILEKMDGTEE  
LLVKNREDLLRKQRTFDNGSIPHQIHLGELHAILRRQEDFYFPLKDNREKIEKILTFRIPYYVGPLA  
RGNSRFAMTRKSEETITPWNFEEVVDKGASAQSFIERMTNFDKNLPNEKVLPHKSLLYEYFTVYNEL  
TKVKYVTEGMRKPAFLSGEQKKAIVDLLFKTNRKVTVKQLKEDYFKKIECFDSVEISGVEDRFNASLG  
TYHDLLKIIKDKDFLDNEENEDILEDIVLTLTLFEDREMIEERLKYAHLFDDKVMKQLKRRRYTGWG  
RLSRKLINGIRDKQSGKTILDFLKSDGFANRNFQMQLIHDDSLTFKEDIQKAQVSGQGDSLHEHIANLA  
GSPAIKKGI<sup>LQ</sup>TVKVVDELVKVMGRHKPENIVIEMARENQ<sup>TTQKGQKNSRERMKRIEEGIKELGSGGS</sup>  
<sup>SEVEFS</sup>HEYWMRHALTLAKRARDEREVPVGVAVLVLNNRVIGEGWNRAIGLHDPTAHAEIMALRQGGLV  
MQNYRLIDATLYVTFEPCVMCAGAMIHSRIGRVVFGVRNAKTGAAGSLMDVLHYPGMNHRVEITEGIL  
ADECAALLCYFFRMPRQVFNAQKKAQSSTD<sup>SGGSSGGSSGSETPGTSESATPESSGGSSGGSSEVEFS</sup>  
<sup>HEYWMRHALTLAKRARDEREVPVGVAVLVLNNRVIGEGWNRAIGLHDPTAHAEIMALRQGGLVMQNYRL</sup>  
<sup>IDATLYVTFEPCVMCAGAMIHSRIGRVVFGVRNAKTGAAGSLMDVLHYPGMNHRVEITEGILADECAA</sup>  
<sup>LLCYFFRMPRQVFNAQKKAQSSTD</sup>SGGRQLVETRQITKHVAQILDSRMNTKYDENDKLIREVKVITLK  
SKLVSDFRKDFQFYKVREINNYHHAHDAYLNAVVG<sup>TALIKKYPKLESEFVYGDYKVYDVRKMIAKSEQ</sup>  
EIGKATAKYFFYSNIMNFFKTEITLANGEIRKRPLIETNGETGEIVWDKGRDFATVRKVL<sup>SMPQVNIV</sup>  
KKTEVQTGGFSKESILPKRNSDKLIAR<sup>KKDWDPKKYGGFDSPTVAYSVLVAKVEKGSKKLKSVKEL</sup>  
LGITIMERS<sup>SFEKNPIDFLEAKGYKEVKKDLIIKLPKYSLFELENGRKRMLASAGELQKGNELALPSK</sup>  
YVNFLYLASHYEKLK<sup>GSPEDNEQQLFVEQHKHYLDEII</sup>EQISEFSKRVI<sup>LADANLDKVL</sup>SAYNKHRD  
KPIREQAENIIHLFTLTNLGAPAAFKYFDTTIDR<sup>KRYTSTKEVLDATLIHQ</sup>SITGLYETRIDLSQLGG  
DSGGS<sup>KRTADGSEFE</sup>PKKKR<sup>KV</sup>

Nuclear localization signal, SpCas9, Linker (Cas9), Linker (Gly-Gly-Ser, Ser-Gly-Gly), TadA (adenosine deaminase, 7.10), Linker, TadA (WT)

## HNHx-ABE8eHD

MKRTADGSEFE<sup>S</sup>PKKKR<sup>KV</sup>GS<sup>SD</sup>KKYSIGLAIGTNSVGWAVITDEYKVPSK<sup>K</sup>FKVLGNTDRHSIKKNLI  
GALLFDSGETAEATRLKRTARRRYTRRKNRICYLQEIFSNEMAKVDDSF<sup>F</sup>HRL<sup>EES</sup>FLVEEDKKHERH  
PIFGNIVDEVAYHEKYPTIYHLRKKLV<sup>SD</sup>TKADLRLIYLALAHMIKFRGHFLIEGDLNPDNSDV<sup>DKL</sup>  
FIQLVQTYNQLFEENPINASGVDAKAILSARLSKSRLENLIAQLPGEKKNGLFGNLI<sup>ALS</sup>GLTPNF  
KSNFDLAEDAKLQLSKD<sup>TY</sup>DDDLNLLAQIGDQYADLFLAAKNLSDAILLSDILRVNTEITKAPLSAS  
MIKRYDEHHQDLTLLKALVRQQLPEKYKEIFFDQSKNGYAGYIDGGASQEEFYKFIKPILEKMDGTEE  
LLV<sup>KL</sup>NREDLLRKQRTFDNGSIPHQIHLGELHAILRRQEDFY<sup>P</sup>FLKDNREKIEKILTFRIPYYVGPLA  
RGNSRFAMTRKSEETITPWNFEEVVDKGASAQSFIERMTNFDKNLPNEKVL<sup>PKH</sup>SLLYEYFTVYNEL  
TKVKYVTEGMRKPAFLSGEQKKAIVDLLFKTNRKVTVKQLKEDYFKKIECFDSVEISGVEDRFNASLG  
TYHDLLKIIKDKDFLDNEENEDILEDIVLTLTLFEDREMIEERLKYAHLFDDKVMKQLKRRRYTGWG  
RLSRKLINGIRDKQSGKTILD<sup>FL</sup>KSDGFANRNF<sup>ML</sup>LIHDDSLTFKEDIQKAQVSGQGDSLHEHIANLA  
GSPA<sup>IK</sup>KGILQTVKVVDELVKVMGRHKPENIVIEMARENQTTQKGQKNSRERMKRIE<sup>E</sup>GIKELGSGGS  
SEVEFSHEYWMRHALTLAKRARDEREVPVGAVLVLN<sup>NR</sup>VIGEGWNRAIGLHDPTAHAEIMALRQGG<sup>LV</sup>  
MQNYRLIDATLYVTFEPCVMCAGAMIHSRIGRVVFGVRNSKRGAA<sup>GL</sup>SLMNVLNYPGMNHRVEITEGIL  
ADECAALLCDFYRMPRQVFNAQKKAQSSTNSGGSSGGSSGSETPGTSESATPESSGGSSGGSSSEVEFS  
HEYWMRHALTLAKRARDEREVPVGAVLVLN<sup>NR</sup>VIGEGWNRAIGLHDPTAHAEIMALRQGG<sup>LV</sup>MQNYRL  
IDATLYVTFEPCVMCAGAMIHSRIGRVVFGVRNAKTGAAGSLMDVLHYPGMNHRVEITEGILADECAA  
LLCYFFRMPRQVFNAQKKAQSSTDSGG<sup>R</sup>QLVETRQITKHVAQILDSRMNTKYDENDKLIREVKVITLK  
SKLVSDFRKDFQFYK<sup>RE</sup>INNYHHAHDAYLNAVVG<sup>TAL</sup>IKKYPKLESEFVYGDYKVYDVRKMIAKSEQ  
EIGKATAKYFFYSNIMNFFKTEITLANGEIRKRPLIETNGETGEIVWDKGRDFATVRKVL<sup>SMP</sup>QVNIV  
KKTEVQTGGFSKESILPKRNSDKLIAR<sup>KK</sup>DWDPKKYGGFDSPTVAYSVLVAKVEK<sup>GK</sup>SKKLKSVKEL  
LGITIMERS<sup>S</sup>FEKNPIDFLEAKGYKEVKKDLIIKLPKYS<sup>L</sup>FELENGRKRMLASAGELQKGNELALPSK  
YVNFLYLASHYEKLK<sup>G</sup>SPEDNEQQLFVEQHKHYLDEIEEQISEFSKR<sup>VIL</sup>ADANLDKVL<sup>SAY</sup>NKHRD  
KPIREQAENIIHLFTLNLGAPAAF<sup>KY</sup>FDTTIDRKRYTSTKEVLDATLIHQ<sup>SIT</sup>GLYETRIDLSQLGG  
DSGGS<sup>KRT</sup>ADGSEFE<sup>P</sup>PKKKR<sup>KV</sup>

Nuclear localization signal, SpCas9, Linker (Cas9), Linker (Gly-Gly-Ser, Ser-Gly-Gly), TadA (adenosine deaminase, 7.10), Linker, TadA (WT)

## HNHx - PmCDA1

MKRTADGSEFEFSPKKKRKVGSDDKKYSIGLAIGTNSVGWAVITDEYKVPSKKFKVLGNTDRHSIKKNLI  
GALLFDSGETAEATRLKRTARRRYTRRKNRICYLQEIFSNEMAKVDDSFHRLEESFLVEEDKKHERH  
PIFGNIVDEVAYHEKYPTIYHLRKKLVDSTDKADLRLIYLALAHMIKFRGHFLIEGDLNPDNSDVDKL  
FIQLVQTYNQLFEEENPINASGVDAKAILSARLSKSRLENLIAQLPGEKKNGLFGNLIALLSLGLTPNF  
KSNFDLAEDAQLQSKDQTYDDDLNLLAQIGDQYADLFLAAKNLSDAILLSDILRVNTEITKAPLSAS  
MIKRYDEHHQDLTLLKALVRQQLPEKYKEIFFDQSKNGYAGYIDGGASQEEFYKFIKPILEKMDGTEE  
LLVKLNREDLLRKQRTFDNGSIPHQIHLGELHAILRRQEDFYFPLKDNREKIEKILTFRIPYYVGPLA  
RGNSRFAMWTRKSEETITPWNFEEVVDKGASAQSFIERMTNFDKNLPNEKVLPHKSLLYEYFTVYNEL  
TKVKYVTEGMRKPAFLSGEQKKAIVDLLFKTNRKVTVKQLKEDYFKKIECFDSVEISGVEDRFNASLG  
TYHDLLKIIKDKDFLDNEENEDILEDIVLTLTLFEDREMIEERLKYAHLFDDKVMKQLKRRRYTGWG  
RLSRKLINGIRDKQSGKTILDFLKSDGFANRFMQLIHDDSLTFKEDIQKAQVSGQGDLSHEHIANLA  
GSPAIIKKGILQTVKVVDELVKVMGRHKPENIVIEMARENQTTQKGQKNSRERMKRIIEGKELGSTDA  
EYVRIHEKLDIYTFKKQFSNNKKSVMHRCYVLFELKRRGERRACFWGYAVNKPQSGTERGIHAEI FSI  
RKVEEYLRDNPQGFITINWYSSWSPCADCAEKILEWYNQELRGNHTLKIWVCKLYYEKNARNQIGLWN  
LRDNGVGLNVMVSEHYQCCRKIFIQSSHNQLNENRWLEKTLKRAEKRRSELSIMFQVKILHTTKSPAV  
SGGSGGRQLVETRQITKHVAQILD SRMNTKYDENDKLIREVKVITLKSCLVSDFRKDFQFYKVINN  
YHHAHDAYLNAVVG TALIKKYPKLESEFVYGDYKVDVRKMIKSEQEIGKATAKYFFYSNIMNFFKT  
EITLANGEIRKRELIETNGETGEIVWDKGRDFATVRKVL SMPQVNIVKKTEVQTGGFSKESILPKRNS  
DKLIARKKDWDPKKYGGFDSPTVAYSVLVAKVEK GKSKKLKSVKELLGITIMERSSEKPNPIDFLEA  
KGYKEVKKDLIIKLPKYSLFELENGRKRLASAGELQKGNELALPSKYVNFYLYLASHYEKLGSPEDN  
EQKQLFVEQHKHYLDEIEQISEFSKRVI LADANLDKVL SAYNKHRDKPIREQAENI IHLFTLTNLGA  
PAAFKYFDTTIDRKRYTSTKEVLDATLIHQ SITGLYETRIDLSQLGGDSGGSGGSGGSTNLSDIIEKE  
TGKQLVIQESILMLPEEVEEVIGNKPESDILVHTAYDESTDENVMLLTS DAPEYKPWALVIQDSNGEN  
KIKMLSGGSGGSGGSTNLSDIIEKETGKQLVIQESILMLPEEVEEVIGNKPESDILVHTAYDESTDEN  
VMLLTS DAPEYKPWALVIQDSNGENKIKMLSGGSKRTADGSEFEFPPKKKRKV

Nuclear localization signal, SpCas9, Linker (Cas9), Linker (Ser-Gly-Gly-Ser-Gly-Gly), PmCDA1, UGI

**FERNY (=evolved APOBEC) Variant**

MKRTADGSEFFESPKKKRKVGSDDKKYSIGLAIGTNSVGVAVITDEYKVPSKKFKVLGNTDRHSIKKNLI  
GALLFDSGETAEATRLKRTARRRYTRRKNRICYLQEIFSNEMAKVDDSFHRLEESFLVEEDKKHERH  
PIFGNIVDEVAYHEKYPTIYHLRKKLVSTDKADLRLIYLALAHMIKFRGHFLIEGDLNPDNSDVKL  
FIQLVQTYNQLFEEENPINASGVDAKAILSARLSKSRLENLIAQLPGEKKNGLFGNLIASLGLTPNF  
KSNFDLAEDAQLQSKDQYDDDLNLLAQIGDQYADLFLAAKNLSDAILLSDILRVNTEITKAPLSAS  
MIKRYDEHHQDLTLLKALVRQQLPEKYKEIFFDQSKNGYAGYIDGGASQEEFYKFIKPILEKMDGTEE  
LLVKNREDLLRKQRTFDNGSIPHQIHLGELHAILRRQEDFYFPLKDNREKIEKILTFRIPYYVGPLA  
RGNSRFAMTRKSEETITPWNFEEVVDKGASQSFIERMTNFDKNLPNEKVLPHKSLLYEYFTVYNEL  
TKVKYVTEGMRKPAFLSGEQKKAIVDLLFKTNRKVTVKQLKEDYFKKIECFDSVEISGVEDRFNASLG  
TYHDLLKIIKDKDFLDNEENEDILEDIVLTLTLFEDREMIEERLKYAHLFDDKVMKQLKRRRYTGWG  
RLSRKLINGIRDKQSGKTILDFLKSDGFANRNFQMQLIHDDSLTFKEDIQKAQVSGQGDLSHEHIANLA  
GSPAIIKKGILQTVKVVDELVKVMGRHKPENIVIEMARENQTTQKSGSGSGSFERNYDPRELRKETYLL  
YEIKWKGSGKLRHWCQNNRTQHAEVYFLENIFNARRFNPSTHCSITWYLSWSPCAECSQKIVDFLKE  
HPNVNLEIYVARLYPENERNRQGLRDLVNSGVTIRIMDLPDYNICWKTFFVSDQGGDEYWPGHFAPW  
IKQYSLKLSGKAGFIKRQLVETRQITKHVAQILDSRMNTKYDENDKLIREVKVITLKSCLVSDFRKDF  
QFYKVINNYHHAHDAYLNAVVGTAIIKKYPKLESEFVYGDYKVDVRKMIKSEQEI GKATAYFF  
YSNIMNFFKTEITLANGEIRKRPLIETNGETGEIVWDKGRDFATVRKVL SMPQVNIVKKTEVQTGGFS  
KESILPKRNSDKLIARKKDWDPKKYGGFDSPTVAYSVLVAKVEKKGSKKLSVKELLGITIMERSSE  
EKNPIDFLEAGYKEVKKDLIIKLPKYSLFELENGRKRMLASAGELQKGNELALPSKYVNFLYLASHY  
EKLKGS PEDNEQQLFVEQHKKHYLDEII EQISEFSKRVI LADANLDKVL SAYNKHRDKPIREQAENII  
HLFTLTNLGAPAAFYFDTTIDRKRYTSTKEVL DATLIHQSI TGLYETRIDLSQLGGDSGGSGSGGS  
TNLSDIIEKETGKQLVIQESILMLPEEVEEVIGNKPESDILVHTAYDESTDENVMLLTSDAPEYKPWA  
LVIQDSNGENKIKMLSGSGSGSGSTNLSDIIEKETGKQLVIQESILMLPEEVEEVIGNKPESDILVH  
TAYDESTDENVMLLTSDAPEYKPWALVIQDSNGENKIKMLSGGSKRTADGSEFFESPKKKRKV

Nuclear localization signal, SpCas9, Linker (Cas9), Linker (Ser-Gly-  
Gly-Ser-Gly-Ser, Ser-Gly), FERNY (=evolved APOBEC), UGI

**ABEmax7.10 PI1**

MKRTADGSEFESPKKKRKVGSDDKKYSIGLAIGTNSVGVAVITDEYKVPSKKFKVLGNTDRHSIKKNLI  
GALLFDSGETAEATRLKRTARRRYTRRKNRICYLQEIFSNEMAKVDDSFHRLEESFLVEEDKKHERH  
PIFGNIVDEVAYHEKYPTIYHLRKKLVSTDKADLRLIYLALAHMIKFRGHFLIEGDLNPDNSDVKL  
FIQLVQTYNQLFEEENPINASGVDAKAILSARLSKSRLENLIAQLPGEKKNGLFGNLIASLGLTPNF  
KSNFDLAEDAQLQSKDQTYDDDLNLLAQIGDQYADLFLAAKNLSDAILLSDILRVNTEITKAPLSAS  
MIKRYDEHHQDLTLLKALVRQQLPEKYKEIFFDQSKNGYAGYIDGGASQEEFYKFIKPILEKMDGTEE  
LLVKNLREDLLRKQRTFDNGSIPHQIHLGELHAILRRQEDFYFPLKDNREKIEKILTFRIPIYYVGPLA  
RGNSRFAMTRKSEETITPWNFEEVVDKGAQSFIERMTNFDKNLPNEKVLPHKSLLYEYFTVYNEL  
TKVKYVTEGMRKPAFLSGEQKKAIVDLLFKTNRKVTVKQLKEDYFKKIECFDSVEISGVEDRFNASLG  
TYHDLLKIIKDKDFLDNEENEDILEDIVLTLTLFEDREMIEERLKYAHLFDDKVMKQLKRRRYTGWG  
RLSRKLINGIRDKQSGKTILDFLKSDFANRNFQMQLIHDDSLTFKEDIQKAQVSGQGDLSHEHIANLA  
GSPAIIKKGILQTVKVVDELVKVMGRHKPENIVIAMARENQTTQKGQKNSRERMKRIEEGKELGSQIL  
KEHPVENTQLQNEKLYLYLQNGRDMYVDQELDINRLSDYDVDHIVPQSFLKDDSIDNKVLTRSDKNR  
GKSDNVPSEEVVKKMKNYWRQLLNAKLITQRKFDNLTKAERGGLSELDKAGFIKRQLVETRQITKHVA  
QILDSRMNTKYDENDKLIREVKVITLKSCLVSDFRKDFQFYKVVREINNYHHAHDAYLNAVVGTAIIKK  
YPKLESEFVYGDYKVYDVRKMIKSEQEIGKATAKYFFYSNIMNFFKTEITLANGEIRKRPLIETNGE  
TGEIVWDKGRDFATVRKVLSPQVNIIVKKTVEVQTGGFSKESILPKRNSDKLIARKKDWDPKKYGGFDS  
PTVAYSVLVAKVEKGGKSKLKSVEKLLGITIMERSSEFEKNPIDFLEAKGYKEVKKDLIIKLPKYSLE  
ELENKRKRLASAGELQKGNELALPSKYVNFYLYLASHYEKLGGSGGSGSGSGSGSSEVEFSHEYWM  
RHALTLAKRARDEREVPGAVLVLNNRVIGEGWNRAIGLHDPTAHAEIMALRQGGLVMQNYRLIDATL  
YVTFEPCVMCAGAMIHSRIGRVVFGVRNAKTGAAGSLMDVLHYPGMNHRVEITEGILADECAALLCYF  
FRMPRQVFNAQKKAQSSTDGGSGSGSGSGSGSPEDNEQKQLFVEQHKHYLDEIIIEQISEFSKRVIL  
ADANLDKVL SAYNKHRDKPIREQAENI IHLFTLTNLGAPAAFKYFDTTIDRKRYTSTKEVL DATLIHQ  
SITGLYETRIDLSQLGGDSGGSKRTADGSEFEPKKKRKV

Nuclear localization signal, SpCas9, Linker (Gly-Gly-Ser), TadA  
(adenosine deaminase, 7.10)

**ABEmax7.10 PI2**

MKRTADGSEFESPKKKRKVGSDDKYSIGLAIGTNSVGWAVITDEYKVPSSKKFKVLGNTDRHSIKKNLI  
GALLFDSGETAEATRLKRTARRRYTRRKNRICYLQEIFSNEMAKVDDSFHRLEESFLVEEDKKHERH  
PIFGNIVDEVAYHEKYPTIYHLRKKLVSTDKADLRLIYLALAHMIKFRGHFLIEGDLNPDNSDVDKL  
FIQLVQTYNQLFEEENPINASGVDAKAILSARLSKSRLENLIAQLPGEKKNGLFGNLIASLGLTPNF  
KSNFDLAEDAQLQSKDQYDDDLNLLAQIGDQYADLFLAAKNLSDAILLSDILRVNTEITKAPLSAS  
MIKRYDEHHQDLTLLKALVRQQLPEKYKEIFFDQSKNGYAGYIDGGASQEEFYKFIKPILEKMDGTEE  
LLVKNLREDLLRKQRTFDNGSIPHQIHLGELHAILRRQEDFYFPLKDNREKIEKILTFRIPIYYVGPLA  
RGNSRFAMTRKSEETITPWNFEEVVDKGSASQSFIERMTNFDKNLPNEKVLPHKSLLYEYFTVYNEL  
TKVKYVTEGMRKPAFLSGEQKKAIVDLLFKTNRKVTVKQLKEDYFKKIECFDSVEISGVEDRFNASLG  
TYHDLLKIIKDKDFLDNEENEDILEDIVLTLTLFEDREMIEERLKYAHLFDDKVMKQLKRRRYTGWG  
RLSRKLINGIRDKQSGKTILDFLKSDFANRNFQMQLIHDDSLTFKEDIQKAQVSGQGDLSHEHIANLA  
GSPAIAKKGILQTVKVVDELVKVMGRHKPENIVIEARENQTTQKGQKNSRERMKRIEEGKELGSQIL  
KEHPVENTQLQNEKLYLYLQNGRDMYVDQELDINRLSDYDVDHIVPQSFLKDDSIDNKVLTRSDKNR  
GKSDNVPSEEVVKKMKNYWRQLLNAKLITQRKFDNLTKAERGGLSELDKAGFIKRQLVETRQITKHVA  
QILDSRMNTKYDENDKLIREVKVITLKSCLVSDFRKDFQFYKVREINNYHHAHDAYLNAVVGTAIIKK  
YPKLESEFVYGDYKVYDVRKMIKSEQEIGKATAKYFFYSNIMNFFKTEITLANGEIRKRPLIETNGE  
TGEIVWDKGRDFATVRKVLSPQVNIKKTEVQTGGFSKESILPKRNSDKLIARKKDWDPKKYGGFDS  
PTVAYSVLVAKVEKGSKLLKSVKELLGITIMERSSEFKNPIDFLEAKGYKEVKKDLIIKLPKYSLE  
ELENKRMLASAGELQKGNELALPSKYVNFYLYLASHYEKLGGSSGGSSEVEFSSHEYWMRHALTL  
AKRARDEREVPVAVLVLNNRVIGEGWNRAIGLHDPTAHAEIMALRQGGLVMQNYRLIDATLYVTFEP  
CVMCAGAMIHSRIGRVVFGVRNAKTGAAGSLMDVLHYPGMNRVEITEGILADECAALLCYFFRMPRQ  
VFNAQKKAQSSTDGGSGSGSGSGSPEDNEQKQLFVEQHKHYLDEIIEQISEFSKRVILADANLDKVL  
SAYNKHRDKPIREQAENIIHLFTLTNLGAPAAFYFDTTIDRKRYTSTKEVLDATLIHQSITGLYETR  
IDLSQLGGDSSGSKRTADGSEFEPKKRKV

Nuclear localization signal, SpCas9, Linker (Gly-Gly-Ser), TadA  
(adenosine deaminase, 7.10)

**ABEmax7.10 PI3**

MKRTADGSEFESPKKKRKVGSDDKYSIGLAIGTNSVGWAVITDEYKVPSSKKFKVLGNTDRHSIKKNLI  
GALLFDSGETAEATRLKRTARRRYTRRKNRICYLQEIFSNEMAKVDDSFHRLEESFLVEEDKKHERH  
PIFGNIVDEVAYHEKYPTIYHLRKKLVSTDKADLRLIYLALAHMIKFRGHFLIEGDLNPDNSDVDKL  
FIQLVQTYNQLFEENPINASGVDAKAILSARLSKSRLENLIAQLPGEKKNGLFGNLIALSGLTPNF  
KSNFDLAEDAQLQSKDTYDDDLNLLAQIGDQYADLFLAAKNLSDAILLSDILRVNTEITKAPLSAS  
MIKRYDEHHQDLTLLKALVRQQLPEKYKEIFFDQSKNGYAGYIDGGASQEEFYKFIKPILEKMDGTEE  
LLVKLNREDLLRKQRTFDNGSIPHQIHLGELHAILRRQEDFYFPLKDNREKIEKILTFRIPIYYVGPLA  
RGNSRFAMTRKSEETITPWNFEEVVDKGASAQSFIERMNTNFDKNLPNEKVLPHKSHLLYEYFTVYNEL  
TKVKYVTEGMRKPAFLSGEQKKAIVDLLFKTNRKVTVKQLKEDYFKKIECFDSVEISGVEDRFNASLG  
TYHDLLKIIKDKDFLDNEENEDILEDIVLTLTLFEDREMIEERLKYAHLFDDKVMKQLKRRRYTGWG  
RLSRKLINGIRDKQSGKTILDFLKSDFANRNFQMQLIHDDSLTFKEDIQKAQVSGQGDLSHEHIANLA  
GSPAIKKGILQTVKVVDELVKVMGRHKPENIVIEMARENQTTQKGQKNSRERMKRIEEGIKELGSQIL  
KEHPVENTQLQNEKLYLYLQNGRDMYVDQELDINRLSDYDVDHIVPQSFLKDDSIDNKVLTRSDKNR  
GKSDNVPSEEVVKKMKNYWRQLLNAKLITQRKFDNLTKAERGGLSELDKAGFIKRQLVETRQITKHVA  
QILDSRMNTKYDENDKLIREVKVITLKSKLVSDFRKDFQFYKVREINNYHHAHDAYLNAVVGTALIKK  
YPKLESEFVYGDYKVYDVRKMIAKSEQEIGKATAKYFFYSNIMNFFKTEITLANGEIRKRPLIETNGE  
TGEIVWDKGRDFATVRKVLSMPQVNIVKKTEVQTGGFSKESILPKRNSDKLIARKKDWDPKKYGGFDS  
PTVAYSVLVAKVEKGKSKKLKSVKELLGITIMERSSSFEKNPIDFLEAKGYKEVKKDLIIKLPKYSLF  
ELENGRKRLASAGELQKGNELALPSKYVNFLYLASHYEKLKGSGSGSGSSEVEFSHEYWMRHALTL  
AKRARDEREVPVGAVLVLNNRVIGEGWNRAIGLHDPTAHAEIMALRQGGLMQNYRLIDATLYVTFEP  
CVMCAGAMIHSRIGRVVFGVRNAKTGAAGSLMDVLHYPGMNHRVEITEGILADECAALLCYFFRMPRQ  
VFNAQKKAQSSTDGSGSGSGSPEDNEQKQLFVEQHKHYLDEIEEQISEFSKRVILADANLDKVLSAY  
NKHRDKPIREQAENIIHLFTLTNLGAPAAFKYFDTTIDRKRYTSTKEVLDATLIHQSITGLYETRIDL  
SQLGGDSGGSKRTADGSEFEPKKRKV

Nuclear localization signal, SpCas9, Linker (Gly-Gly-Ser), TadA  
(adenosine deaminase, 7.10)

**SaKKH-HNHx-ABEmax7.10 (S484)**

MKRTADGSEFFESPKKKRKVGSKRNYILGLAIGITSVGYGIIDYETRDVIDAGVRLFKEANVENNEGR  
SKRGARRLKRRRRHRIQRVKKLLFDYNLLTDHSELSGINPYEARVKGLSQKLSEEEFSAALLHLAKRR  
GVHNVNEVEEDTGNELSTKEQISRNSKALEEKYVAELQLERLKKDGEVRGSINRFKTSDYVKEAKQLL  
KVQKAYHQLDQSFIDTYIDLLETRRYYEGPGEPSFGWKDIKEWYEMLMGHCTYFPEELRSVKYAYN  
ADLYNALNDLNNLVITRDENEKLEYEYKQI IENVFKQKKKPTLKQIAKEILVNEEDIKGYRVTSTGK  
PEFTNLKVYHDIKDITARKEI IENAELLDQIAKILTIYQSSEDIQEELTNLNSELTQEEIEQISNLKG  
YTGTHNLSLKAINLILDELWHTNDNQIAIFNRLKLVPKKVDLSQQKEIPTTLVDDFILSPVVKRSFIQ  
SIKVINAI IKKYGLPNDII IELAREKNSGSSEVEFSHEYWMRHALTLAKRARDEREVPVGAVLVLNNR  
VIGEGWNRAIGLHDPTAHAEIMALRQGGLVMQNYRLIDATLYVTFEPCVMCAGAMIHSRIGRVVFGVR  
NAKTGAAGSLMDVLHYPGMNRVEITEGILADECAALLCYFFRMPRQVFNAQKKAQSSTDSSTRYATR  
GLMNLRSYFRVNNLDVKVKSINGGFTSFLRRKWKFKKERNKGYKHAEDALI IANADFIKWKKLD  
KAKVMENQMFEEKQAESMPEIETEQEYKEIFITPHQIKHIKDFKDYKYSHRVDKKPNRKLINDTLYS  
TRKDDKGNTLIVNNLNGLYDKDNDKLLKLINKSPEKLLMYHHPQTYQKLKLIMEQYGDEKNPLYKYY  
EETGNYLTKYSKKNPVIKIKYGNKLNALDITDDYPNSRNKVVKLSLKPYPFDVYLDNGVYKVV  
TVKNLDVIKKNYEVNSKCYEEAKLKKISNQAEFIASFYKNDLIKINGELYRVIGVNNDLLNRIEV  
NMIDITYREYLENMNDKRPPHI IKTIAKTQSIKYSTDILGNLYEVKSKKHPQIIKKGSGGSKRTAD  
GSEFEPKKKRKV

Nuclear localization signal, SaKKH, Linker (Gly-Ser, Ser-Ser), TadA  
(adenosine deaminase, 7.10)



**SaKkH-HNHx-ABEmax7.10 (G513)**

MKRTADGSEFFESPKKKRKVGSKRNYILGLAIGITSVGYGIIDYETRDVIDAGVRLFKEANVENNEGR  
SKRGARRLKRRRRHRIQRVKKLLFDYNLLTDHSELSGINPYEARVKGLSQKLSEEEFSAALLHLAKRR  
GVHNVNEVEEDTGNELSTKEQISRNSKALEEKYVAELQLERLKKDGEVRSINRFKTSDYVKEAKQLL  
KVQKAYHQLDQSFIDTYIDLLETRRYYEGPGEKSPFGWKDIKEWYEMLMGHCTYFPEELRSVKYAYN  
ADLYNALNDLNNLVITRDENEKLEYEYKQI IENVFKQKKKPTLKQIAKEILVNEEDIKGYRVTSTGK  
PEFTNLKVYHDIKDITARKEI IENAELLDQIAKILTIYQSSEDIQEELTNLNSELTQEEIEQISNLKG  
YTGTHNLSLKAINLILDELWHTNDNQIAIFNRLKLVPKKVDLSQQKEIPTTLVDDFILSPVVKRSFIQ  
SIKVINAI IKKYGLPNDII IELAREKNSKDAQKMINEMQKRNRQTNERIEEII RTTGSSSEVEFSHEY  
WMRHALTLAKRARDEREVPGAVLVLNNRVI GEGWNRAIGLHDPTAHAEIMALRQGGGLVMQNYRLIDA  
TLYVTFEPCVMCAGAMIHSRIGRVVFGVRNAKTGAAGSLMDVLHYPGMNRVEITEGILADECAALLC  
YFFRMPRQVFNAQKKAQSSTDSSSVQKDFINRNLVDTRYATRGLMNLRSYFRVNNLDVKVKSINGGF  
TSFLRRKWKFKKERNKGYKHAEDALI IANADFIFKEWKKLDKAKKVMENQMFEKQAESMPEIETEQ  
EYKEIFITPHQIKHIKDFKDYKYSRVDKKNRKLINDTLYSTRKDDKGNTLIVNNLNGLYDKDNDKL  
KKLINKSPEKLLMYHHDPPQTYQKLKLIMEQYGDEKNPLYKYYEETGNYLTKYSKKDNGPVIKKIKYYG  
NKLNAHLDITDDYPNSRNKVVKLSLKPFRFDVYLDNGVYKFVTVKNLDVIKENYYEVNSKCYEEAKK  
LKKISNQAEFIASFYKNDLIKINGELYRVIGVNDLLNRIEVNMIDITYREYLENMNDKRPPIIKTI  
ASKTQSIKKYSTDILGNLYEVKSKKHPQIIKKGSGGSKRTADGSEFFEPKKKRKV

Nuclear localization signal, SaKkH, Linker (Gly-Ser, Ser-Ser), TadA  
(adenosine deaminase, 7.10)
